# Supplementary material for: Electrical Vagal Nerve Stimulation Ameliorates Pulmonary Vascular Remodeling and Improves Survival in Rats With Severe Pulmonary Arterial Hypertension
Source: PubMed Central journal article supplement — JACC Basic Transl Sci. 2018 Nov 12;3(5):657–71. doi: 10.1016/j.jacbts.2018.07.007 (PMC6234524; doi:10.1016/j.jacbts.2018.07.007), 2018-11-12
Supplement: mmc1.pdf [file mmc1.pdf]

# 1 Supplemental Figure 1

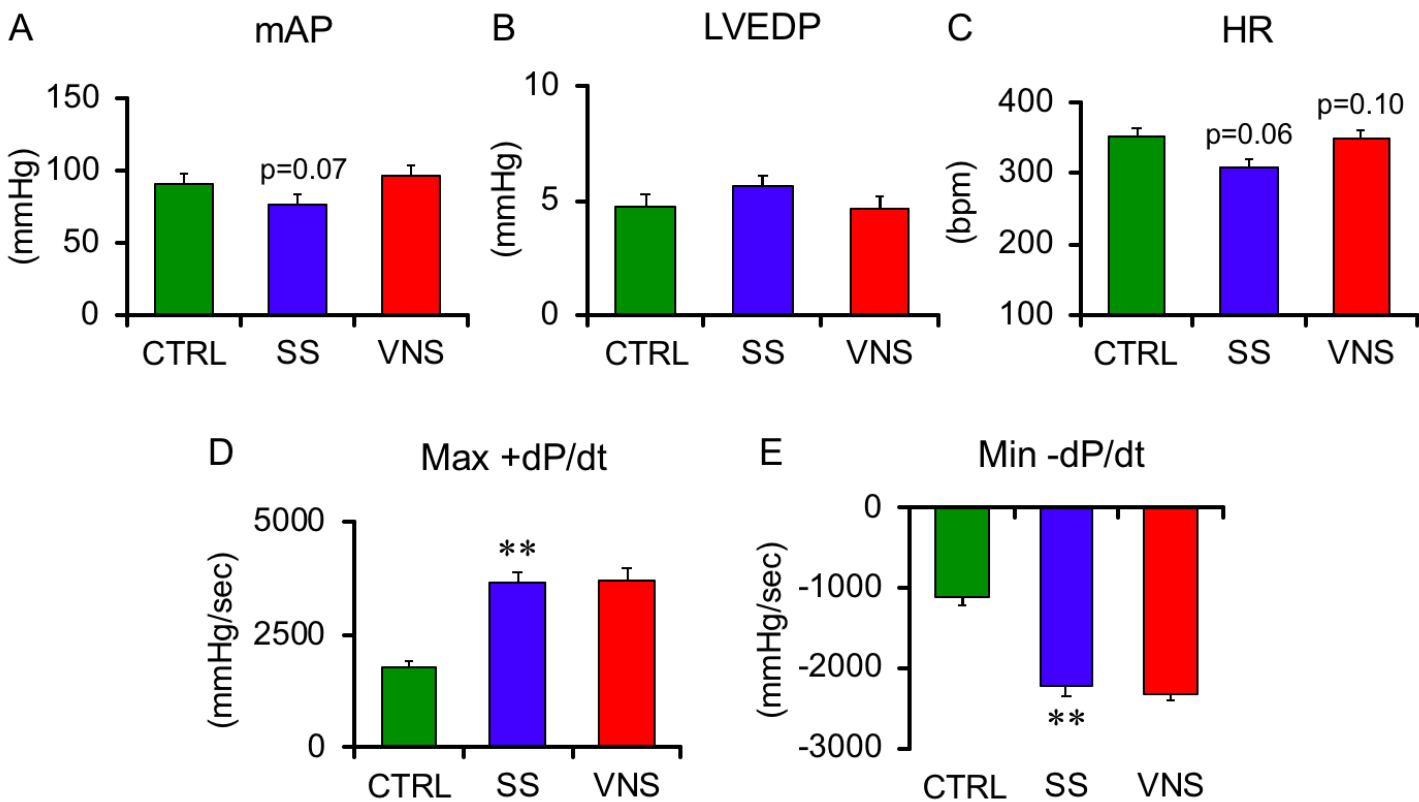

2

3 The effects of chronic vagal nerve stimulation (VNS) on hemodynamics in control (CTRL, n=5), sham stimulation (SS, n=6) and VNS (n=6) rats 5 weeks after SU5416 injection.

4 There are no significant differences in mean arterial pressure (mAP), left ventricular end-diastolic pressure (LVEDP), or heart rate (HR) among 3 groups (A-C).

5 Max +dP/dt (D) and Min -dP/dt (E) of RV are significantly higher in SS than in CTRL, while there are no significant differences between VNS and SS.

6 Data are expressed as mean  $\pm$  SEM. Differences were tested by one-way analysis of variance, followed by post-hoc Tukey-Kramer test.

7 \*\*p < 0.01 vs. CTRL.

12

## 13 **SUPPLEMENTAL MATERIALS:**

### 14 **Assessment of heart rate variability**

15 Beat to beat (RR) intervals were obtained from 10-min telemetric ECG  
16 recording during daytime. The RR-interval time series were used to derive power spectral  
17 density (PSD, msec<sup>2</sup>/Hz) by Fourier transform, plotting power in milliseconds squared  
18 per Hertz (msec<sup>2</sup>/Hz) versus Hertz, for frequencies up to 2.0 Hz. The frequency range of  
19 0.04–0.73 Hz was defined as low frequency (LF) and 0.73–2.0 Hz as high frequency (HF)  
20 (1).

21

### 22 **Hemodynamic assessment and right ventricular hypertrophy**

23 Hemodynamic data were recorded under general anesthesia with a mixture of  
24 urethane (250 mg/mL) +  $\alpha$ -chloralose (40 mg/mL) and mechanical ventilation. Each  
25 signal is obtained at 1000 Hz using a 16-bit analog-to-digital converter (Power Lab 16/35,  
26 AD Instruments, Sydney, Australia) and stored in a dedicated laboratory computer system.  
27 LV end-diastolic pressure (LVEDP) and right ventricular (RV) end-diastolic pressure  
28 (RVEDP) were averaged for at least 10 sequential beats. Both Max +dP/dt and Min –  
29 dP/dt in RV pressure were calculated from the first time derivative of instantaneous RV  
30 pressure (2). Max +dP/dt was divided by RVEDP to normalize the preload effect.  
31 Pulmonary vascular resistance (PVR) was calculated as follow:  $PVR = (\text{mean PAP} -$   
32  $LVEDP)/CO$ .

33

### 34 **Collection of lung and right heart samples for histological analysis**

35 At the end of each hemodynamic study in protocol 1B, the lungs were inflated

36 with 10% formalin plus 0.5% agarose at 20 cm H<sub>2</sub>O pressure, and fixed in 10% formalin  
37 overnight. The left and right lobes were blocked and paraffin embedded. All sections were  
38 cut at 5- $\mu$ m. The right heart was also harvested and immediately fixed in buffered 10%  
39 paraformaldehyde, embedded in paraffin, and cut into 5- $\mu$ m thick sections.

40

#### 41 **Luminal occlusive lesion of pulmonary arteries**

42 Verhoeff van Gieson (EVG) staining was performed for morphometric analysis  
43 of pulmonary arteries. All small PAs (more than 100 vessels per cross-section of left lobes  
44 including the hilum, outer diameter < 100  $\mu$ m) were evaluated. Vessels were assessed for  
45 occlusive neointimal lesions on EVG-stained slides and scored as: no evidence of  
46 neointimal formation (grade 0), partial luminal occlusion (< 50 %, grade 1), or severe-  
47 luminal occlusion ( $\geq$  50 %, grade 2). PA occlusion rate was expressed as percentage for  
48 each grade. We assessed the vessels with outer diameter (OD)  $\leq$  50  $\mu$ m and 50 < OD <  
49 100  $\mu$ m (3).

50

#### 51 **Macrophage migration of pulmonary arteries**

52 Macrophages were detected by immunostaining using anti-CD68 antibody  
53 (1:50 dilution; MCA341B, Serotec). The number of CD68-positive cells were counted  
54 within a 100- $\mu$ m diameter circle around the vessel (outer diameter, 30-70  $\mu$ m) in 10  
55 random fields at  $\times$ 400 magnification (4).

56

#### 57 **Cell proliferation of pulmonary arteries**

58 The number of proliferative cells was evaluated by anti-Ki67 antibody (1:400  
59 dilution; RM-9106-S1, Thermo Scientific). Ki67positive cells were counted within a 100-

60  $\mu\text{m}$  diameter circle around the vessel (outer diameter, 30-70  $\mu\text{m}$ ) in 10 random fields at  
61  $\times 400$  magnification (4).

62

### 63 **Apoptotic cells of pulmonary arteries**

64 Apoptotic cells were labeled using a TdT-mediated dUTP-biotin nick end  
65 labeling (TUNEL) *in situ* apoptosis detection kit (MK500, Takara). TUNEL-positive cells  
66 in pulmonary arteries (outer diameter, 30-70  $\mu\text{m}$ ) were counted in 10 random fields at  
67  $\times 400$  magnification (5).

68

### 69 **Fibrosis of right ventricle**

70 Masson Trichrome (MT) staining was performed on serial sections of the right  
71 ventricle. The percentage of fibrotic area was quantified on digitized images: blue-stained  
72 tissue area was expressed as a percentage of the total surface area of RV (6).

73

### 74 **Capillary density of right ventricle**

75 Capillary epithelium was detected by anti-CD34 antibody (1:100 dilution; LS-  
76 C150289, LS Bio). Capillary density was expressed as the number of capillaries per  
77 section area, measured in at least three randomly chosen areas per ventricle, where  
78 cardiomyocytes were transversally sectioned at  $\times 400$  magnification (7).

79

### 80 **Apoptotic ratio of right ventricle**

81 Apoptotic ratio was expressed as the number of TUNEL-positive myocytes  
82 divided by the total number of cardiomyocytes per field. Apoptosis was assessed in at  
83 least three randomly chosen areas per ventricle, where cardiomyocytes were transversally

84 sectioned at  $\times 200$  magnification (6).

85

### 86 **Immunoblot analysis of the expression of eNOS and phospho-eNOS**

87 In protocol 2, harvested lungs were frozen at  $-80^{\circ}\text{C}$  and then homogenized in  
88 HEPES buffer. The protein concentration of the lysate was determined using a Coomassie  
89 protein assay kit (Pierce, Rockford, IL, USA) with bovine serum albumin as standard.  
90 Ten  $\mu\text{g}$  of protein was used to detect the expression of endothelial nitric oxide synthase  
91 (anti-eNOS antibody; 1:5,000; #9572, CST, Danvers, USA) and phosphorylated-eNOS  
92 (anti-phospho-eNOS; 1:2,000; #9571, CST, Danvers, USA) (8). The protein amount was  
93 normalized by the loading control,  $\beta$ -actin (anti- $\beta$ -actin; 1:2,000; #E2710, CST, Danvers,  
94 USA).

95

### 96 **RT-PCR analysis**

97 In protocol 2, total RNA of lung tissue was extracted using the RNeasy Mini  
98 Kit (QIAGEN). The mRNA levels were determined by real-time PCR. For reverse  
99 transcription and amplification, we used the ReverTra Ace qPCR Kit (TOYOBO) and  
100 SYBR Premix Ex Taq (TaKaRa), respectively. The acquired fluorescence data were  
101 analyzed by  $\Delta\Delta\text{Ct}$  method, with *18s* as internal control.

102

103

## 104 PCR primers

| Symbol             | Sequence |                                         |
|--------------------|----------|-----------------------------------------|
| <i>IIIb</i>        | Forward  | 5'-CCC TGA ACT CAA CTG TGA AAT AGC A-3' |
|                    | Reverse  | 5'-TTC CAA GCC CTT GAC TTG GG-3'        |
| <i>II6</i>         | Forward  | 5'-ATT GTA TGA ACA GCG ATG ATG CAC-3'   |
|                    | Reverse  | 5'-TCT GGA GTT CCG TTT CTA CCT GG-3'    |
| <i>Tnfa</i>        | Forward  | 5'-TCA GTT CCA TGG CCC AGA C-3'         |
|                    | Reverse  | 5'-AGC AGT TAA GGC TGA GTT GTC TGA A-3' |
| <i>Mcp1</i>        | Forward  | 5'-TGT GAG GCT CAT CTT TGC CAT C-3'     |
|                    | Reverse  | 5'-CAC CTG CAT GGC CTG GTC TA-3'        |
| <i>III0</i>        | Forward  | 5'-CAG ACC CAC ATG CTC CGA GA-3'        |
|                    | Reverse  | 5'-CAA GGC TTG GCA ACC CAA GTA-3'       |
| <i>Alpha7nachr</i> | Forward  | 5'-TGG TGA CAG TGA TTG TGC TGA GA-3'    |
|                    | Reverse  | 5'-ACC ATG CAC ACC AGT TCA GGA G-3'     |
| <i>18s</i>         | Forward  | 5'-CCC TGA ACT CAA CTG TGA AAT AGC A-3' |
|                    | Reverse  | 5'-CCC AAG TCA AGG GCT TGG AA-3'        |

105

106

107 **References in SUPPLEMENTAL MATERIAL:**

- 108 1. Sanyal SN, Ono K. Derangement of autonomic nerve control in rat with right  
109 ventricular failure. *Pathophysiology* 2002;8:197–203.
- 110 2. GLEASON WL, BRAUNWALD E. Studies on the first derivative of the ventricular  
111 pressure pulse in man. *J Clin Invest* 1962;41:80–91.
- 112 3. Toba M, Alzoubi A, O’Neill KD, et al. Temporal hemodynamic and histological  
113 progression in Sugen5416/hypoxia/normoxia-exposed pulmonary arterial  
114 hypertensive rats. *Am J Physiol Heart Circ Physiol* 2014;306:H243–250.
- 115 4. Abe K, Shinoda M, Tanaka M, et al. Haemodynamic unloading reverses occlusive  
116 vascular lesions in severe pulmonary hypertension. *Cardiovasc Res* 2016;111:16–25.
- 117 5. Long L, Ormiston ML, Yang X, et al. Selective enhancement of endothelial BMPR-  
118 II with BMP9 reverses pulmonary arterial hypertension. *Nat Med* 2015;21:777–785.
- 119 6. Bogaard HJ, Mizuno S, Hussaini AA Al, et al. Suppression of histone deacetylases  
120 worsens right ventricular dysfunction after pulmonary artery banding in rats. *Am J*  
121 *Respir Crit Care Med* 2011;183:1402–1410.
- 122 7. De Man FS, Handoko ML, Van Ballegoij JJM, et al. Bisoprolol delays progression  
123 towards right heart failure in experimental pulmonary hypertension. *Circ Heart Fail*  
124 2012;5:97–105.
- 125 8. Tanaka M, Abe K, Oka M, et al. Inhibition of nitric oxide synthase unmasks vigorous  
126 vasoconstriction in established pulmonary arterial hypertension. *Physiol Rep*  
127 2017;5:e13537.
- 128
